# Supplementary material
Source: PubMed Central journal article supplement (PMC3131650)

**Supplemental.** Percent enrichment of major bacterial groups in the  $^{15}\text{N}$ -amended uncontaminated soil as compared to the  $^{14}\text{N}$ -amended control. The black horizontal line occurs at 100% which indicates no enrichment, while everything above the line is enriched in the  $^{15}\text{N}$  treatment, and everything below is at a deficit when compared with the  $^{14}\text{N}$  control.

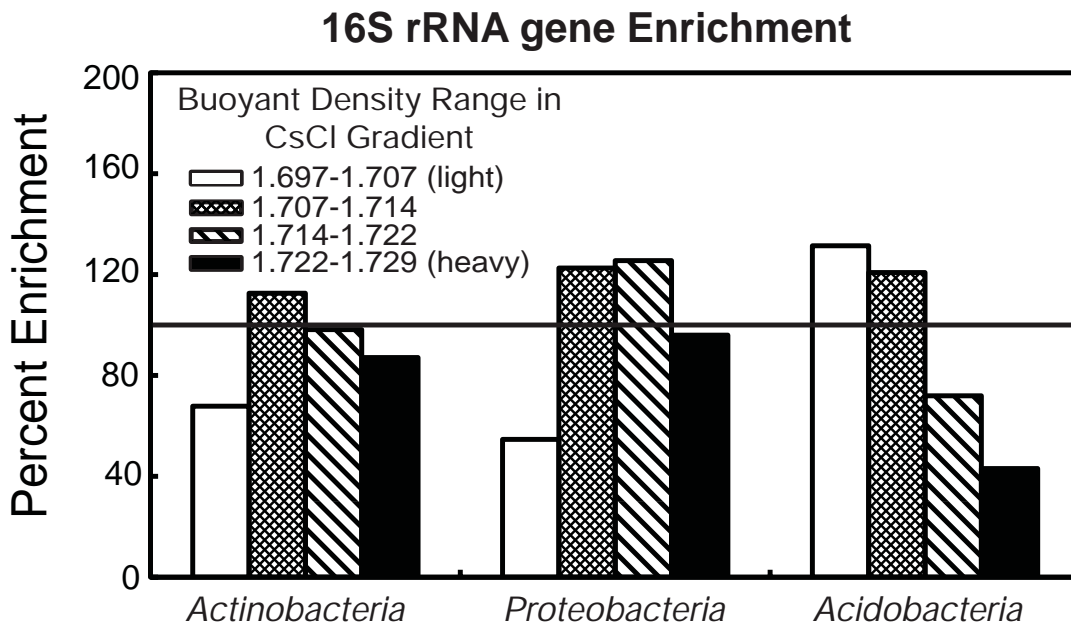

Supplement: supp_77_12_4163__1.pdf [file supp_77_12_4163__1.pdf]
